# Supplementary material
Source: publisher figshare collection journal article supplement (https://acs.figshare.com/ndownloader/files/5960037)
Supplement: Supplementary file 1 [file 5960037]

**Supplementary Information for Identification and Characterization of Complex  
Glycosylated Peptides Presented by the MHC Class II Processing Pathway in Melanoma**

Stacy A. Malaker<sup>1,6</sup>, Michael J. Ferracane<sup>5</sup>, Florence R. Depontieu<sup>4</sup>, Angela L. Zarling<sup>3,7</sup>, Jeffrey Shabanowitz<sup>1</sup>, Dina L. Bai<sup>1</sup>, Suzanne L. Topalian<sup>4</sup>, Victor H. Engelhard<sup>3</sup>, and Donald F. Hunt<sup>1,2†</sup>

Departments of <sup>1</sup>Chemistry and <sup>2</sup>Pathology, and the <sup>3</sup>Beirne B. Carter Immunology Center  
Department of Microbiology, University of Virginia, Charlottesville, VA 22901; <sup>4</sup>Department of  
Surgery, Johns Hopkins University School of Medicine, Baltimore, MD 21205; <sup>5</sup>Department of  
Medicinal Chemistry, University of Florida, Gainesville, FL 32610

<sup>6</sup>Current address: Department of Chemistry, Stanford University, Stanford, CA 94035

<sup>7</sup>Current address: PPD Laboratories, Richmond, VA 23220.

†to whom correspondence should be addressed. Telephone: (434)-924-3610 E-mail:  
dfh@virginia.edu

**Table of Contents:**

**(Table S1) Bovine glycopeptides presented by MHC class II melanoma and EBV cell lines**

**(Table S2) Additional MHC class II glycopeptide information**

| Source Protein                               | Peptide                 | Glycoform | 1102mel | 1363mel | 2048mel | 2048EBV | IEDB |
|----------------------------------------------|-------------------------|-----------|---------|---------|---------|---------|------|
| Apolipoprotein B                             | KSSVITLTNTNVGLYnQS      | 11        | nd      | nd      | nd      | +++     | 0.4  |
| Apolipoprotein D                             | VINKELRADGTVNQIEGEATPEn | 4         | nd      | nd      | ++      | nd      | 0.5  |
|                                              | INKELRADGTVNQIEGEATPEn  | 4         | nd      | nd      | +++     | nd      | 0.5  |
| hemopexin                                    | GnHTWFWDFTKT IK         | 7         | +++     | nd      | nd      | nd      | 2.4  |
| IgG Heavy Chain Constant region              | FnSTYRVVSALRIQH         | 8         | nd      | ++      | nd      | nd      | 0.1  |
|                                              | FnSTYRVVSALRIQHQ        | 8         | nd      | ++      | +++     | nd      | 0.1  |
| IgG3                                         | TKPREQQYnSTLR           | *         | nd      | nd      | +       | nd      | 40   |
|                                              | VHTAQTKPREQQYnSTLR      | *         | nd      | nd      | +       | nd      | 40   |
|                                              | IDVHTAQTKPREQQYnSTLR    | *         | nd      | nd      | +       | nd      | 40   |
| IgG4                                         | EWMGVIsPRDGSTSSA        | 4         | nd      | +       | nd      | nd      | 47.8 |
| Inter-alpha-trypsin inhibitor heavy chain H2 | NPSPAPVLPMPAVGAQVL      | 2         | nd      | +       | nd      | nd      | 0.9  |

**Supplementary Information Table 1. Bovine glycopeptides presented by MHC class II melanoma and EBV cell lines.** Eleven glycopeptides originating from seven bovine proteins presumably originating from the fetal bovine serum used in cell culture medium. Source proteins were determined by *de novo* sequencing and BLAST. Six glycoforms were found on these peptides, which can be referenced from figure 1. One type of glycoform was not found on human proteins, GlcNAc2-Fucose-Mannose3-GlcNAc2-Galactose, indicated by an asterisk. Relative abundance key: nd, not detected, + 1-5 copies/cell, ++ 6-50 copies/cell, +++ 50-150 copies/cell, and ++++ >150 copies per cell.

|       | Uniprot ID | Source Protein                                       | Location | IEDB Score | Allele  |
|-------|------------|------------------------------------------------------|----------|------------|---------|
| 1     | P01023     | Alpha-2-macroglobulin                                | S        |            |         |
| 2     | P11717     | Cation-independent mannose-6-phosphate receptor      | LM       | 7.7        |         |
| 3     | Q6YHK3     | CD109 antigen                                        | M        | 10.8       |         |
| 4-7   | P48960     | CD97 antigen                                         | M        | 8.6        |         |
| 10-13 | P06276     | Cholinesterase                                       | S        | 1.4        | B1*0404 |
| 14    | P39060     | Collagen alpha-1(XVIII) chain                        | S/EM     | 1.9        |         |
| 15    | O75071     | EF-hand calcium-binding domain-containing protein 14 | UK       | 8.5        | B4*0103 |
| 16    | P02751     | Fibronectin                                          | S/EM     | 2          | B1*0404 |
| 17-27 | P07093     | Glia-derived nexin                                   | S/ES     | 7.2        |         |
| 28-33 | P20036     | HLA class II DP alpha 1 chain                        | M        | 3.5        |         |
| 34-37 | P05362     | Intercellular adhesion molecule 1                    | M        | 0.3        |         |
| 38    | P40189     | Interleukin 6 receptor subunit beta                  | M        | 4.8        | B1*0401 |
| 39-41 | P11047     | Laminin subunit gamma-1                              | S/EM     | 4.2        |         |
| 42    | P40126     | L-dopachrome tautomerase                             | MM       | 7.4*       |         |
| 43-47 | P40126     | L-dopachrome tautomerase                             | MM       | 12.7       |         |
| 48-49 | Q14108     | Lysosome membrane protein 2                          | LM       |            |         |
| 50-53 | P11279     | Lysosome-associated membrane glycoprotein 1          | M        | 2.8        | B1*0404 |
| 54-61 | P15586     | N-acetylglucosamine-6-sulfatase                      | LM       | 1.6        | B1*0401 |
| 62    | O00533     | Neural cell adhesion molecule L1-like protein        | M        | 3.9*       |         |
| 63-64 | O15240     | Neurosecretory protein VGF                           | S        |            | B1*0404 |
| 65    | P16671     | Platelet glycoprotein 4                              | M        | 13.2       | B1*0404 |
| 66-75 | P07602     | Prosaposin                                           | S        | 4.5        |         |
| 76    | Q8WTV0     | Scavenger receptor class B member 1                  | M        | 2.8        |         |
| 77    | Q04900     | Sialomucin core protein 24 (MUC24)                   | LM       | *          |         |
| 78-80 | P17948     | Vascular endothelial growth factor receptor 1        | M        | 0.8        |         |

**Supplementary Information Table 2. Additional MHC class II glycopeptide information.**

Peptide numbers correspond to those seen in Table 1. Uniprot ID found on uniprot.org, where annotated cellular location was also determined. Key: S secreted, LM lysosome membrane, M cell membrane, EM extracellular matrix, ES extracellular space, and UK unknown. To determine best 9-residue binding motif, IEDB (<http://tools.iedb.org/mhcii/>) MHC II binding prediction tool was used. The assumed allele is HLA-DR $\beta$ 1\*0101 if found in 1363mel (as it is homozygous). For other cell lines, the lowest scoring allele and motif were used, as indicated in the last column of the table.
